# Supplementary material
Source: PubMed Central journal article supplement (PMC4393884)
Supplement: NIHMS677824-supplement-1.pdf [file NIHMS677824-supplement-1.pdf]

**Supplementary Figure S1, Related to Figure 1. Sequence coverage of full length PR-A and PR-B at different stages of HDX experiments.** (a) MSMS sequence coverage of PR-B and PR-A. Letters in red are amino acid sequence detected by analyzing pepsin digested MS/MS spectra using MASCOT. (b) Sequence coverage (%) obtained during MS/MS, 0 second time point injection ( $t_0$ ) and on-exchange experiments of full length and N terminal domain of PR-B and PR-A.

**Supplementary Figure S2, Related to Figure 1. Solution state conformational flexibility of agonist bound full length PR-B with different domains indicated by arrow head.** The back exchange corrected average % of deuterium incorporation across six different time points (0,10,30,60,300,900 and 3600 sec) are represented in sequence layout format where each horizontal bar represents each peptide. Colors are according to the color bar at the bottom of the figure.

**Supplementary Figure S3, Related to Figure 1. Solution state conformational flexibility of agonist bound full length PR-A with different domains indicated by arrow head.** The back exchange corrected average % of deuterium incorporation across six different time points (0,10,30,60,300,900 and 3600 sec) are represented in sequence layout format where each horizontal bar represents each peptide. Colors are according to the color bar at the bottom of the figure.

**Supplementary Figure S4, Related to Figure 4. Solution state conformational flexibility of TBPc.** The back exchange corrected average % of deuterium incorporation across six different time points (0,10,30,60,300,900 and 3600 sec) are represented in sequence layout format where each horizontal bar represents each peptide. Colors are according to the color bar at the bottom of the figure.

**Supplementary Figure S5, Related to Figure 4.** Differential HDX of isolated N terminal domain (PR-A) showed no perturbation upon interaction with TBP<sub>C</sub>.

(a)

**PR-B**

MTLEKAKGPRAPHVAGGPPSPEVGSPLLCRPAAGPFGSQTSDTLPEVSAIPISLDGLLFPRPCQGDPSDEKTQDQQLSDVEGAYSRAEATRAGAGSSSSPPEKDSGLLDSVLDLTLAPSGPGQSQPSPAC  
 EVTSSWCLFGPELPEDPPAAPATQRVLSPLMSRSGCKVGDSSGTAAAHKVLPRGLSPARQLLLPASESPHWSGAPVKPSPQAAAVEVEEEDGSESEESAGPLLK GKPRALGGAAAGGAAAVPPGAAAGGVAL  
 VPKEDSRFSAPRVALVEQDAPMAPGRSPLATTVMDFIHVPILPLNHALLAARTRQLLEDESVDGGAGAASAFAPPRSSPCASSTPVAVGDFPDCAYPDAEPKDDAYPLYSDFQPPALKIKEEEEGAEASARSP  
 RSYLVAGANPAAFDFPLGPPPLPRATPSRPGEAAVTAAPASASVSSASSSGSTLECILYKAEGAPPQQGPFAPPCKAPGASGCLLPRDGLPSTSASAAAAGAAPALYPALGLNGLPQLGYQAAVLKEGLP  
 QVYPPYLNYLRPDSEASQSPQYSFESLPQKICLICGDEASGCHYGVLTCGCKVFFKRAMEGQHNYLCAGRNDICVDKIRRNKNCACRLRKCQAGMVLGGRKFKNKVRVVRALDAVALPQVGVPNESQ  
 ALSQRFTFSPGQDIQLIPPLINLLMSIEPDVIYAGHDNTKPDTSLLSLNQLGERQLLSVVKWSKSLPGFRNLHIDDQITLIQYSWMSLMVFLGWRSYKHVSGQMLYFAPDLILNEQRMKESSFYSLCLTM  
 WQIQEFVKLQVSQEEFLCMKVVLLLNTIPLEGLRSQTQFEEMRSSYIRELIKAIGLRQKGVVSSSRFYQLTKLLDNLHDLVKQLHLYCLNTFIQSRALSVEFPEMMSEVIAAQLPKILAGMVKPLLFHKK

**PR-A**

MSRSGCKVGDSSGTAAAHKVLPRGLSPARQLLLPASESPHWSGAPVKPSPQAAAVEVEEEDGSESEESAGPLLK GKPRALGGAAAGGAAAVPPGAAAGGVALVPKEDSRFSAPRVALVEQDAPMAPGR  
 SPLATTVMDFIHVPILPLNHALLAARTRQLLEDESVDGGAGAASAFAPPRSSPCA SSTPVAVGDFPDCAYPDAEPKDDAYPLYSDFQPPALKIKEEEEGAEASARSPRSYLVAGANPAAFDFPLGPPPLP  
 PRATPSRPGEAAVTAAPASASVSSASSSGSTLECILYKAEGAPPQQGPFAPPCKAPGASGCLLPRDGLPSTSASAAAAGAAPALYPALGLNGLPQLGYQAAVLKEGLPQVYPPYLNYLRPDSEASQSPQYS  
 FESLPQKICLICGDEASGCHYGVLTCGCKVFFKRAMEGQHNYLCAGRNDICVDKIRRNKNCACRLRKCQAGMVLGGRKFKNKVRVVRALDAVALPQVGVPNESQALSQRFTFSPGQDIQLIPPLINL  
 LMSIEPDVIYAGHDNTKPDTSLLSLNQLGERQLLSVVKWSKSLPGFRNLHIDDQITLIQYSWMSLMVFLGWRSYKHVSGQMLYFAPDLILNEQRMKESSFYSLCLTMWQIQEFVKLQVSQEEFLC  
 MKVVLLLNTIPLEGLRSQTQFEEMRSSYIRELIKAIGLRQKGVVSSSRFYQLTKLLDNLHDLVKQLHLYCLNTFIQSRALSVEFPEMMSEVIAAQLPKILAGMVKPLLFHKK

(b)

| Isoform | MSMS | t0 (FL) | t0 (NTD only) | On exchange (FL) | On exchange (NTD only) |
|---------|------|---------|---------------|------------------|------------------------|
| PR-A    | 75   | 72      | 59            | 68.7             | 47                     |
| PR-B    | 78   | 75      | 69            | 65.9             | 53                     |

Supplementary Figure S1

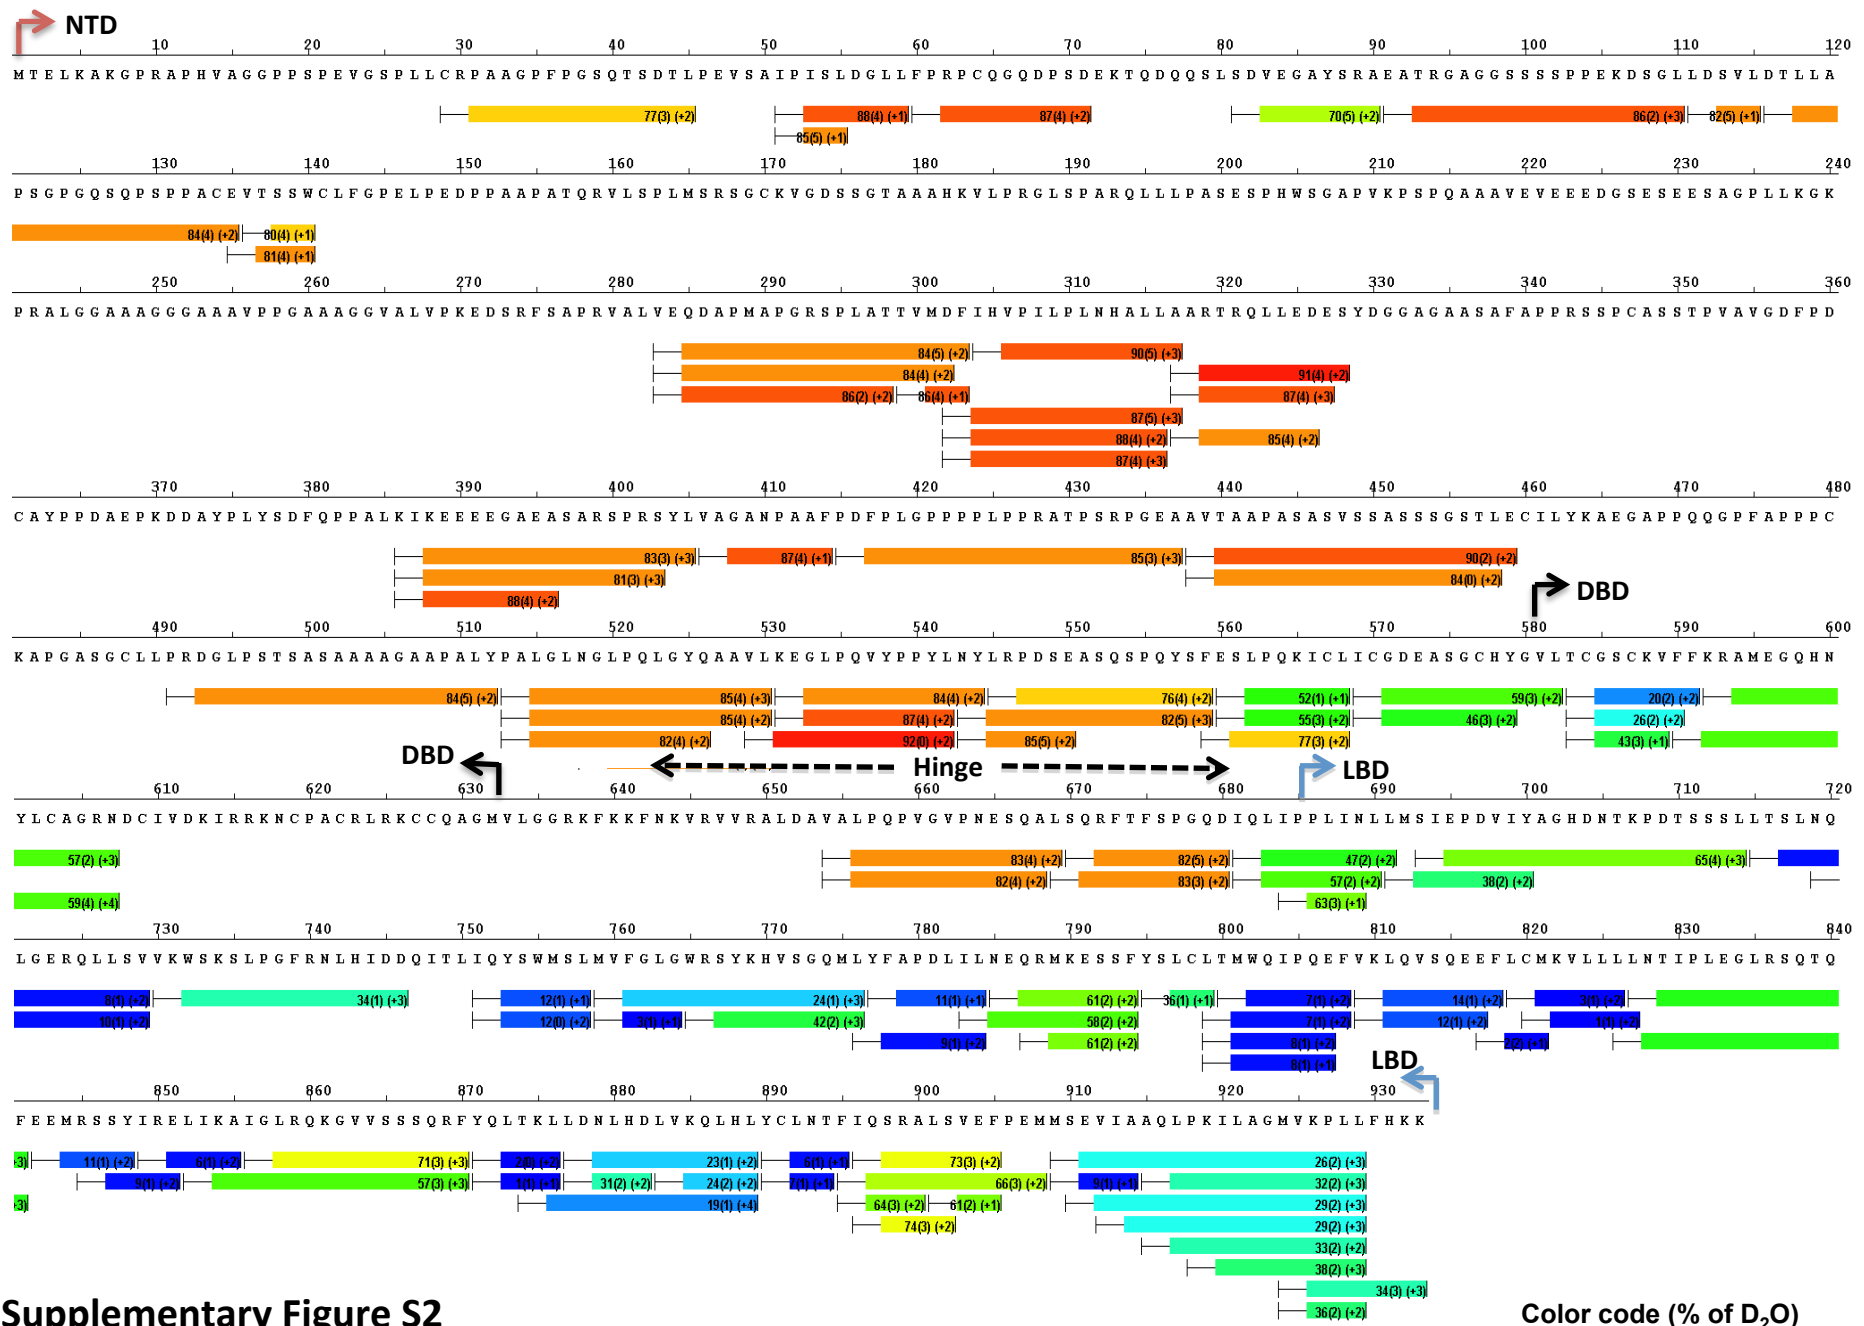

Supplementary Figure S2

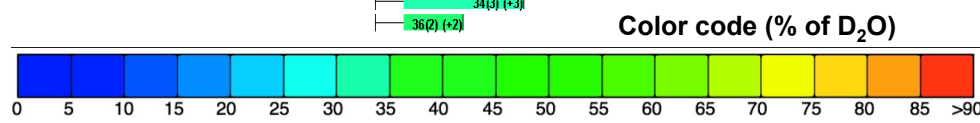

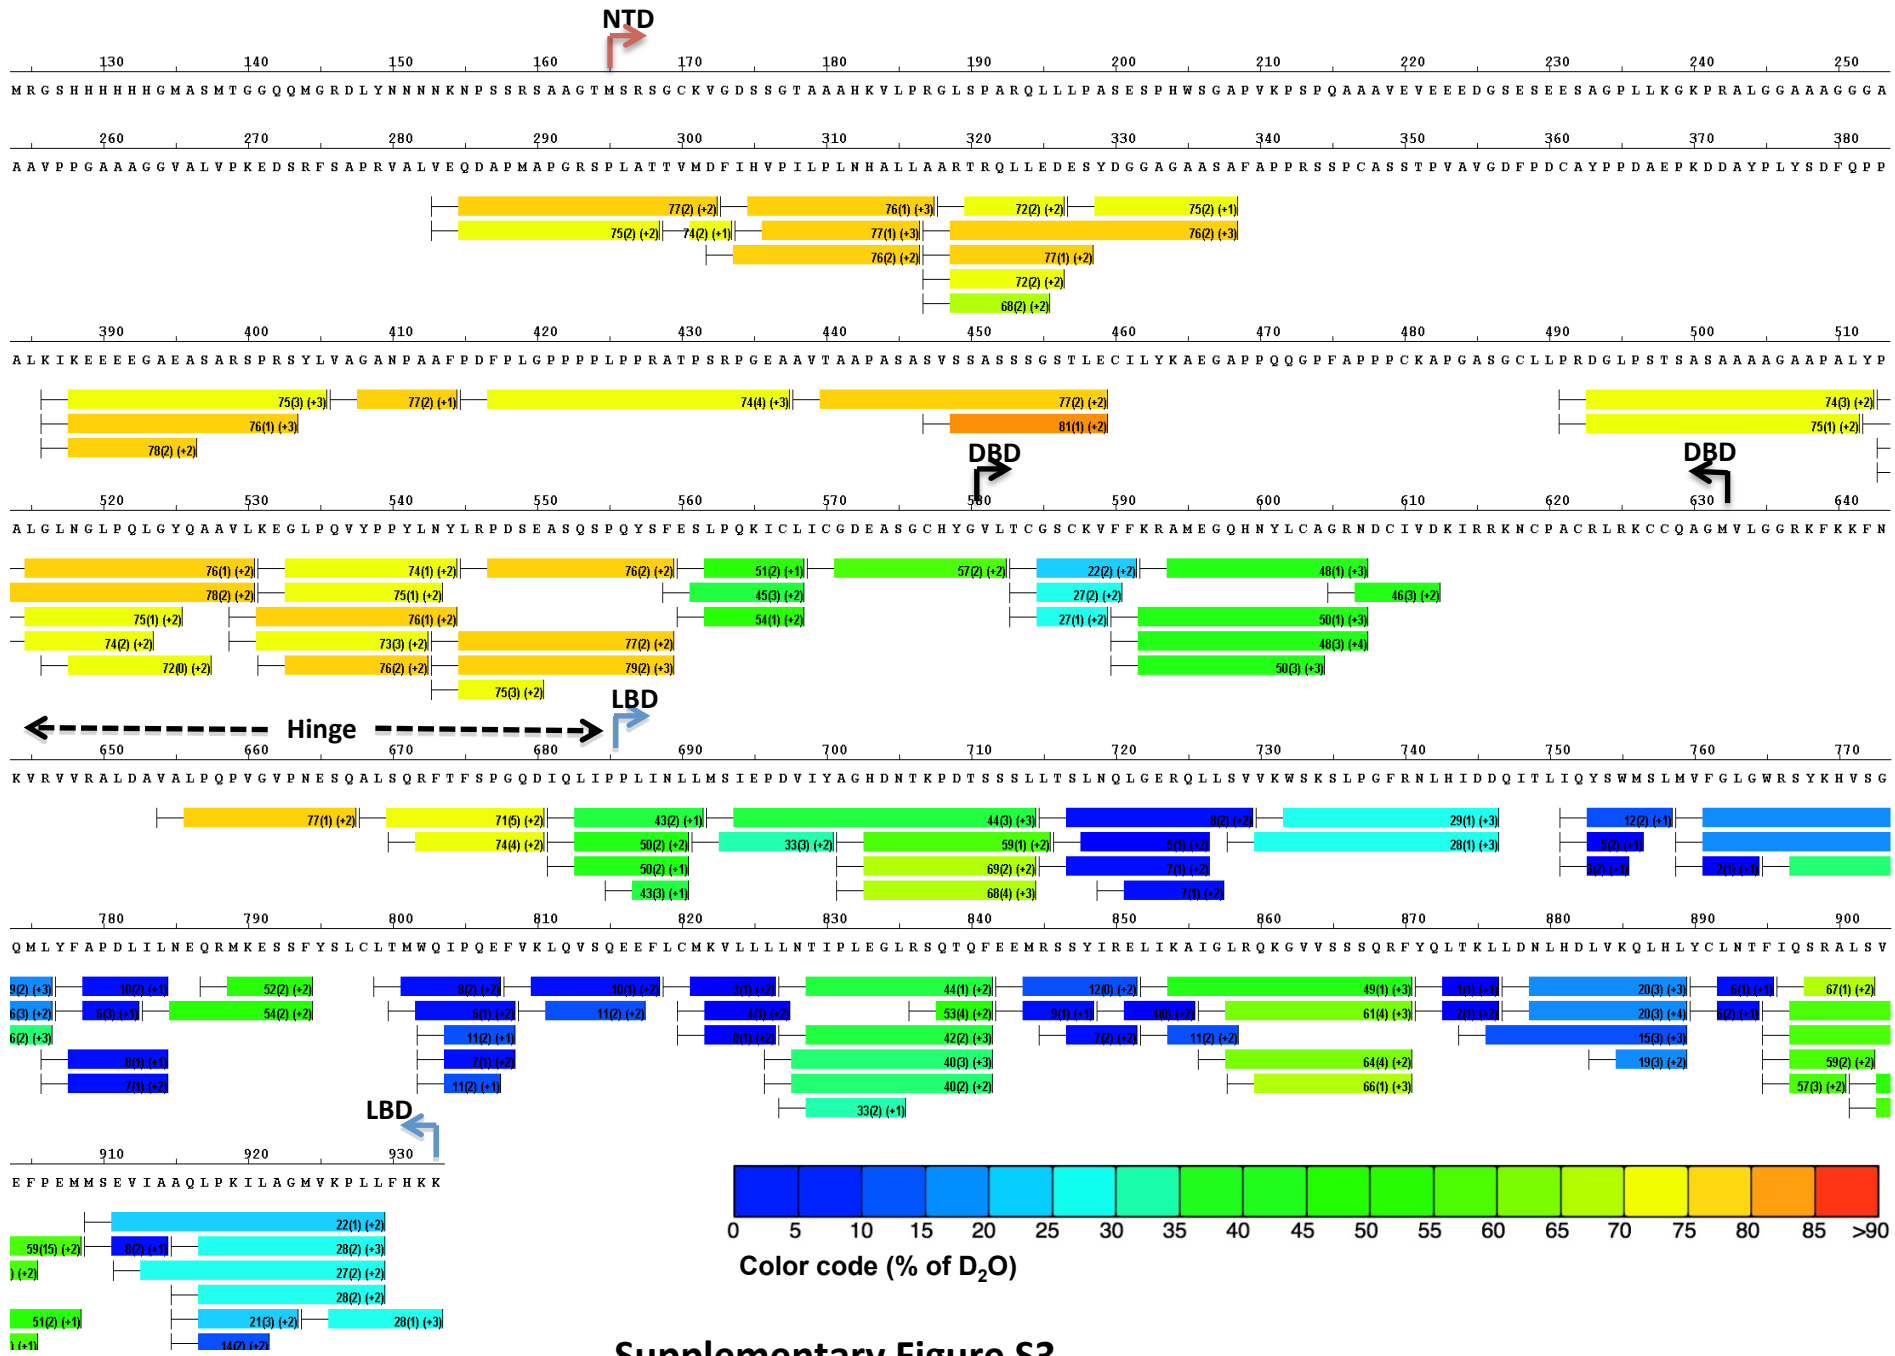

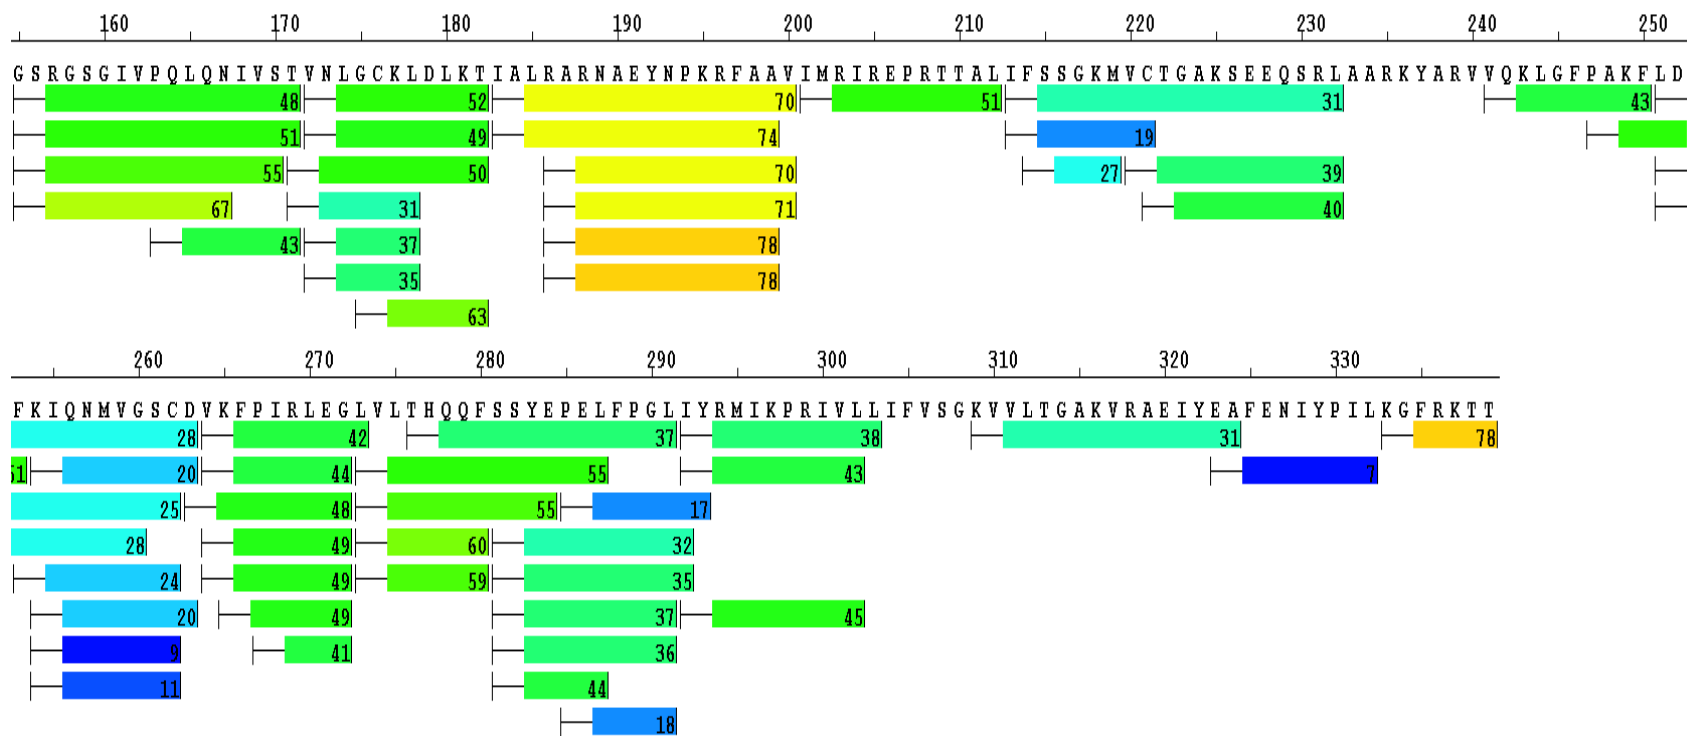

Supplementary Figure S4

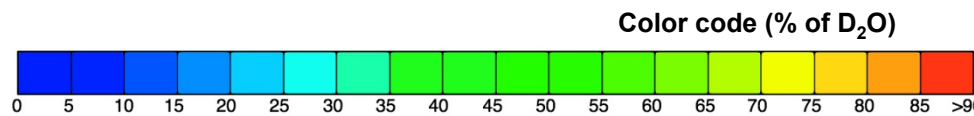

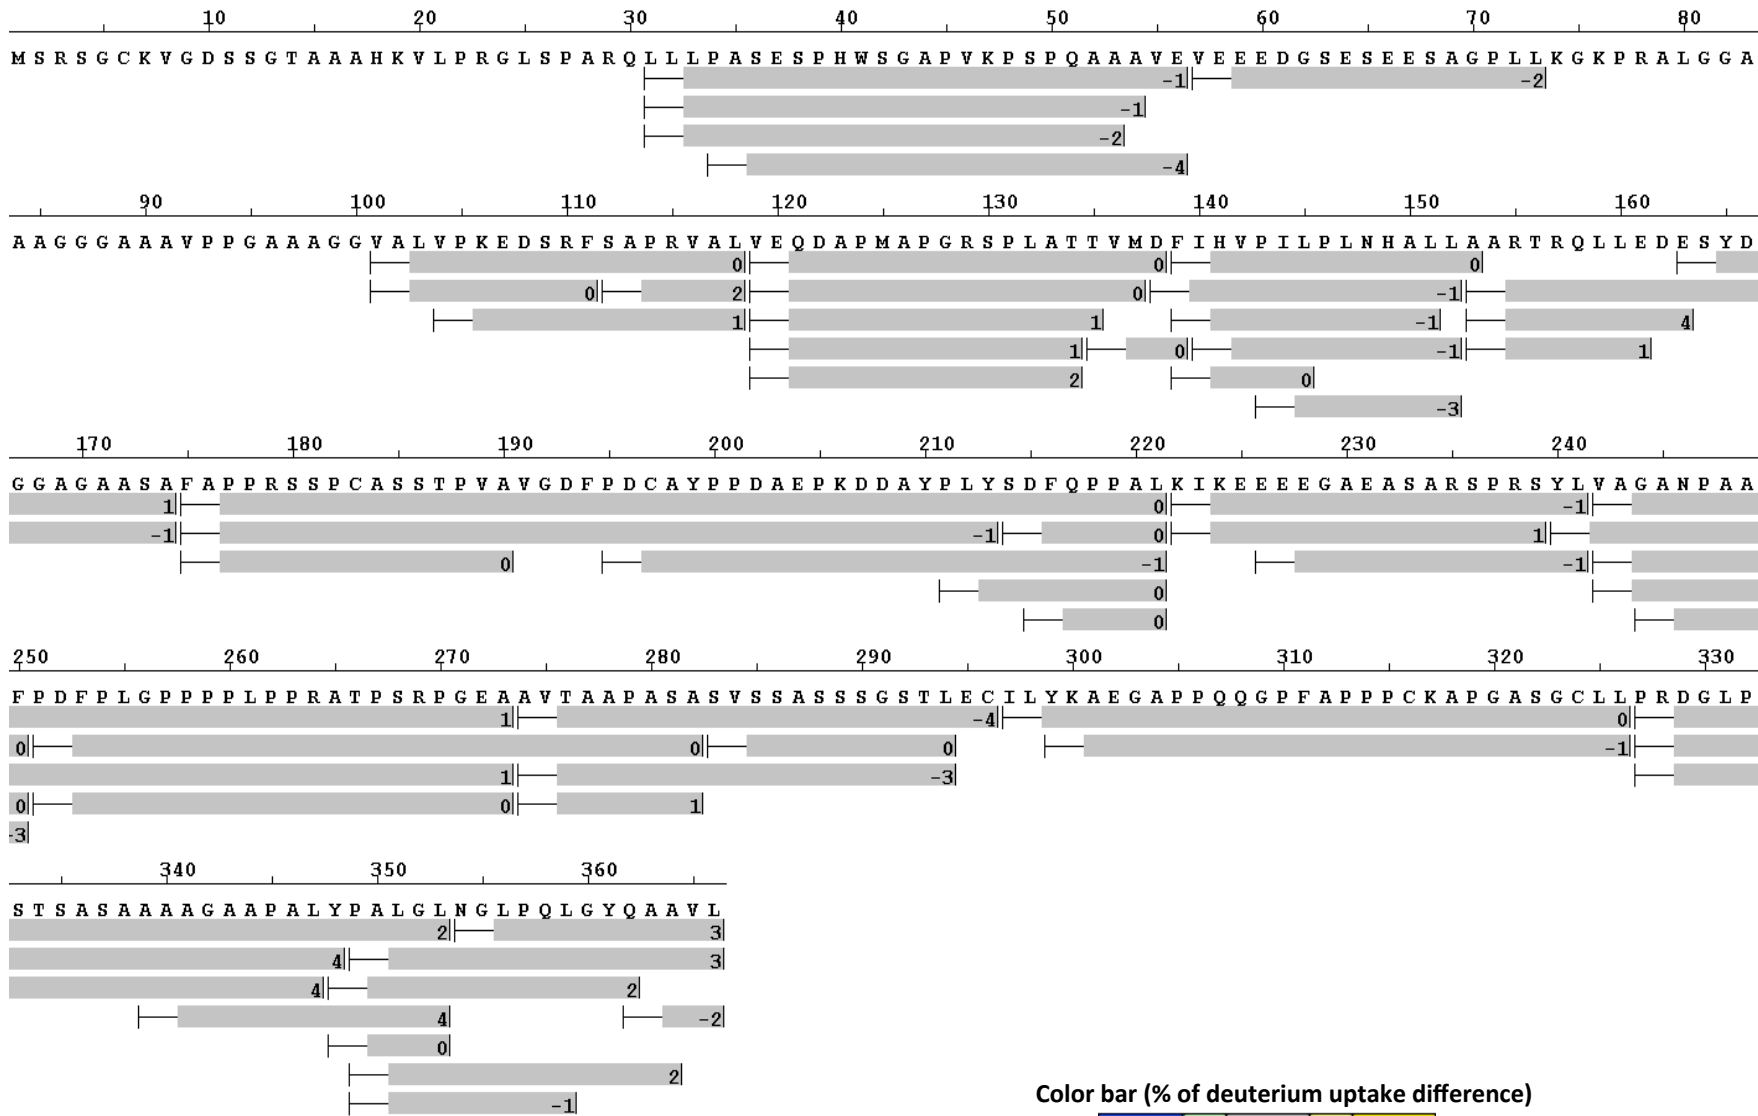

Supplementary Figure S5
